# Supplementary material
Source: ML conference proceedings conference paper supplement (https://openreview.net/forum?id=BM7RjuhAK7W)
Supplement: supplementary_material [file attachment]

# MODEL-INVARIANT STATE ABSTRACTIONS FOR MODEL-BASED REINFORCEMENT LEARNING

**Anonymous authors**

Paper under double-blind review

## ABSTRACT

Accuracy and generalization of dynamics models is key to the success of model-based reinforcement learning (MBRL). As the complexity of tasks increases, learning accurate dynamics models becomes increasingly sample inefficient. However, many complex tasks also exhibit sparsity in dynamics, i.e., actions only have a local effect on the system dynamics. In this paper, we exploit this property with a causal invariance perspective in the single-task setting, introducing a new type of state abstraction called *model-invariance*. Unlike previous forms of state abstractions, model-invariant state abstraction leverages causal sparsity over state variables. This allows for compositional generalization to unseen states, something that non-factored forms of state abstractions cannot do. We prove that an optimal policy can be learned over exact model-invariance state abstraction and show improved generalization in a simple toy domain. Next, we propose a practical method to approximately learn a model-invariant representation for complex domains and validate our approach by showing improved modelling performance over standard maximum likelihood approaches on challenging tasks, such as the MuJoCo-based Humanoid. Finally, within the MBRL setting we show strong performance gains with respect to sample efficiency across a host of continuous control tasks.

## 1 INTRODUCTION

Model-based reinforcement learning or MBRL [4, 15] is a popular framework for data-efficient learning of control policies. At the core of MBRL is learning an environmental dynamics model and using it to: 1) fully plan [14, 11], 2) augment the data used by a model-free solver [51, 54], or 3) use as an auxiliary task while training [35, 58]. However, learning a dynamics model — similar to other supervised learning problems — suffers from the issue of generalization, since the data we train on is not necessarily the data we test on. This is a persistent issue that is worsened in MBRL as even a small inaccuracy in the dynamics model or changes in the control policy can result in visiting completely unexplored parts of the state space [1]. This advocates for the need to learn models capable of generalizing well. Various workarounds for this issue have been explored in the past; for example, combining local but simple models with global, more expressive models [36, 22], using an ensemble of models to handle uncertainty in estimates [11, 33] and coupling the model and policy learning processes [34] so that the model is always accurate to a certain threshold. However, these approaches do not stem from a representation learning viewpoint and thus fail to leverage special structure in dynamics for better generalization.

This paper studies how to improve generalization capabilities through careful state abstraction. In particular, we leverage two existing concepts to define a new kind of state abstraction. The first concept is that many real world problems exhibit *sparsity* in the local dynamics — given a set of state variables, each variable at timestep  $t + 1$  only depends on a small subset (i.e., local) of all variables in the previous timestep  $t$  (see Figure 1). The second concept is the principle of causal invariance, which dictates that given a set of candidate features, we should aim to build representations that comprise *only* those features that are consistently necessary for predicting the target variable of interest across different interventions [46]. In the MBRL context, we can cast model learning with causal invariance as a supervised objective where the target variables are the next state variables and input features are the current state and action variables (the probable set of causal predictors of the target).

Intuitively, since we learn a predictor that only takes into account invariant features that consistently predict the target variable well, it is likely to contain the true causal features, and therefore, will generalize well to all possible shifts in the data distribution. The two concepts of sparsity and causality are intertwined in that they both are forms of inductive biases that surround the agent dynamics [23]. This paper shows how causal invariance tools can be effectively used to exploit sparsity in dynamics, leading to improved model generalization. Given basic exploratory assumptions, we analyze this question theoretically and show empirically that we can learn a model that generalizes well on state distributions induced by policies distinct from the ones used while learning it. To do this, we introduce a new state abstraction, model-invariance, which leverages sparsity over state variables. We connect this abstraction viewpoint to a concrete problem of generalization in model-based RL, that of arising spurious correlations in the dynamics model, even when all state variables are task relevant. Having built enough intuition, we then introduce a practical method that approximates learning a model-invariant representation for more complex domains that use function approximation (i.e., neural networks (NNs)). We empirically observe that model invariance leads to better model generalization for domains such as the MuJoCo-based Humanoid. Our method is simple to implement and shows strong performance on multiple MuJoCo tasks, outperforming state of the art model-based methods in the low-data regime.

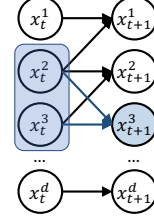

Figure 1: **Graphical model of sparsity** across state variables. The state variable  $x_{t+1}^3$  (shaded in blue) only depends on two variables  $x_t^3$  and  $x_t^2$  (in the blue box). Predicting  $x_{t+1}^3$  using the other variables (say  $x_{t+1}^1$ ) can result in spurious correlations which lead to poor generalization.

## 2 PRELIMINARIES

**RL Setup.** We consider the agent’s interaction with the environment as a discrete time  $\gamma$ -discounted Markov Decision Process (MDP) [47]  $\mathcal{M} = (\mathcal{X}, \mathcal{A}, P, R, \gamma, \mu_0)$ , where  $\mathcal{X} \subseteq \mathbb{R}^d$  is a finite but arbitrarily large state space and  $\mathcal{A}$  is the action space;  $P \equiv P(x'|x, a)$  is the transition kernel;  $R \equiv r(x, a)$  is the reward function with the maximum value of  $R_{\max}$ ;  $\gamma \in [0, 1]$  is the discount factor; and  $\mu_0$  is the initial state distribution. Let  $\pi : \mathcal{X} \rightarrow \Delta_{\mathcal{A}}$  be a stationary memoryless policy, where  $\Delta_{\mathcal{A}}$  is the set of probability distributions on  $\mathcal{A}$ . The value function of a policy  $\pi$  at a state  $x \in \mathcal{X}$  is defined as  $V^\pi(x) \equiv \mathbb{E}[\sum_{t \geq 0} \gamma^t r(x_t, a_t) | x_0 = x, \pi]$ . Similarly, the action-value function of  $\pi$  is defined as  $Q^\pi(x, a) = \mathbb{E}[\sum_{t \geq 0} \gamma^t r(x_t, a_t) | x_0 = x, a_0 = a, \pi]$ . The Bellman optimality operator  $\mathcal{T} : \mathbb{R}^{|\mathcal{X} \times \mathcal{A}|} \rightarrow \mathbb{R}^{|\mathcal{X} \times \mathcal{A}|}$  is defined as  $\mathcal{T}Q(x, a) = r(x, a) + \gamma \langle P(\cdot | x, a), \max_{a'} Q(\cdot, a') \rangle$ . In this work, we assume that all  $d$  state variables  $x^1, x^2, \dots, x^d$  are useful for the task in hand, i.e., we are given the full state. Furthermore, we assume that the transition dynamics over the full state are factorized. More formally:

**Assumption 1. (Transition Factorization)** For given full state vectors  $x_t, x_{t+1} \in \mathcal{X}$ , action  $a \in \mathcal{A}$ , and  $x^i$  denoting the  $i^{\text{th}}$  dimension of state  $x$  we have  $P(x_{t+1} | x_t, a) = \prod_i P(x_{t+1}^i | x_t^i, a)$ .

Note that this is a weaker assumption than factored MDPs [31, 24] as we do not assume a corresponding factorization of the reward function.

**Invariant Causal Prediction.** Invariant causal prediction (ICP) [46] considers the problem of learning an invariant representation w.r.t. spurious correlations that arise due to noise in the underlying causal model (unknown) describing a given system. The key observation is that if one considers the direct causal parents of a response/target variable of interest ( $Y$ ), then the conditional distribution of  $Y$  given these direct causes  $\mathbf{PA}(Y)$  does not change across interventions on any variable except  $Y$ . Therefore, ICP suggests collecting data into different environments (corresponding to different interventions), and to output the set of variables  $X_i$  for which a learned predictor of  $Y$  remains the same given  $X_i$  across the multiple environments with high probability.

**State Abstractions.** State abstractions allow us to map behaviorally-equivalent states into a single abstract state, thus simplifying the learning problem, which then makes use of the (potentially much smaller set of) abstract states instead of the original states [5]. In principle, any function approximation architecture can act as an abstraction, since it attempts to group similar states together. Therefore, exploring the properties of a representation learning scheme as a state abstraction help

develop stronger intuition for building practical algorithms. In the next section, we build our theory based on this connection. A well known state abstraction is bisimulation [19, 48, 37]. Formally, an abstraction  $\phi : \mathcal{X} \mapsto \mathcal{S}$  is a bisimulation if for any two states  $x_1, x_2$  and next state  $x \in \mathcal{X}$ , abstract state  $s \in \mathcal{S}$ ,  $a \in \mathcal{A}$  where  $\phi(x_1) = \phi(x_2)$ , we have  $R(x_1, a) = R(x_2, a)$ , and  $\sum_{x \in \phi^{-1}(s)} P(x|x_1, a) = \sum_{x \in \phi^{-1}(s)} P(x|x_2, a)$ . Since an exact equivalence is not practical, prior work deals with approximate variants through the notion of  $\epsilon$ -closeness [29].

### 3 MODEL INVARIANCE AND ABSTRACTIONS

Current state abstractions such as bisimulation do not provide support for sparse structures. Instead, closeness in abstract states is defined based on probabilities of all state variables together, i.e.,  $x$ . To remedy this, we introduce a new state abstraction, called model-invariance, which is specific to each state variable  $x^i$ . Formally, an invariant abstraction  $\phi_i$  is one which has the same transition probability of the  $i^{\text{th}}$  next state variable  $x^i$  for any two given states  $x_1$  and  $x_2$ , i.e.,  $P(x^i|x_1, a) = P(x^i|x_2, a)$ . Note that if we assume factored rewards, we can define a corresponding reward-based invariant abstraction that parallels the bisimulation abstraction more closely, but we focus here on the reward-free setting. Since it is impractical to ensure this equivalence exactly, we can use an approximate definition which ensures an  $\epsilon$ -closeness.

**Definition 1.** (Approximate Model Invariance)  $\phi$  is  $\epsilon_{i,P}$ -model-invariant if for each index  $i$ ,

$$\sup_{a \in \mathcal{A}, x, x_1, x_2 \in \mathcal{X}, \phi(x_1) = \phi(x_2)} \|P(x^i|x_1, a) - P(x^i|x_2, a)\| \leq \epsilon_{i,P}.$$

$\phi$  is  $\epsilon_R$ -model-invariant if  $\epsilon_R = \sup_{a \in \mathcal{A}, x_1, x_2 \in \mathcal{X}, \phi(x_1) = \phi(x_2)} |R(x_1, a) - R(x_2, a)|$ .

Based on the definition, it intuitively seems like applying the abstraction over the original transition distribution should be close to the transition distribution over abstract states. This can be precisely written in the following lemma, which is a necessary result in ensuring that an optimal policy can still be learnt over a model-invariant abstraction:

**Lemma 1.** (Model Error Bound) Let  $\phi$  be an  $\epsilon_{i,P}$ -approximate model-invariant abstraction on MDP  $M$ . Given any distributions  $p_{s_i} : s_i \in \phi_i(\mathcal{X})$  where  $p_{s_i}$  is supported on  $\phi^{-1}(s_i)$  and  $p_s = \prod_{i=1}^d p_{s_i}$ , we define  $M_\phi = (\phi(\mathcal{X}), \mathcal{A}, P_\phi, R_\phi, \gamma)$  where  $P_\phi(s, a) = \mathbb{E}_{x \sim p_s} [P(\cdot|x, a)]$  and  $R_\phi = \mathbb{E}_{x \sim p_s} [R(x, a)]$ . Then for any  $x \in \mathcal{X}$ ,  $a \in \mathcal{A}$ ,

$$\|P_\phi(s, a) - \Phi P(x, a)\| \leq \sum_{i=1}^d \epsilon_{i,P},$$

where  $\Phi P$  denotes the *lifted* version of  $P$ , where we take the next-step transition distribution from observation space  $\mathcal{X}$  and lift it to latent space  $\mathcal{S}$  (Proof in Appendix 2).  $P_\phi$  refers to the transition probability of a MDP that acts on the states  $\Phi(\mathcal{X})$ , rather than the original MDP. Finally, note that we are particularly concerned with the case where each  $x^i$  is atomic in nature, i.e., it is not further divisible. Such a property ensures that model-invariance does not collapse to bisimulation<sup>1</sup>.

### 4 CAUSAL INVARIANCE IN MODEL LEARNING

Having defined model-invariant abstractions, we are now ready to provide connections between causal invariance and model learning in RL. For simplicity, we can assume that there exists a linear structural equation model [45] that consists of the  $d$  state variables and action  $a$  as the features  $X$  and the next state variable  $x_{t+1}^i$  as the target  $Y$ , for each index  $i$ . Similar to the ICP setting (Section 2), we can define the different environments as follows:

**Assumption 2.** (ICP Environments) For each  $e \in \mathcal{E}$ : the experimental setting  $e$  arises due to one or several interventions on variables from  $(x_t^1, \dots, x_t^d, a_t)$  but not on  $x_{t+1}^i$ ; here, we allow for do-interventions [44] or soft-interventions [18].

<sup>1</sup>In the simplest case index  $i$  describes each state dimension, i.e., being atomic. However in general the index could be a grouping of different dimensions as well. Consider the case where there is only one index over which we build a model invariance abstraction. Now  $x^1$  would then correspond to the entire state  $x$ . Since Definition 1 would be satisfied trivially, we do not gain anything on the sparsity level, thus collapsing to bisimulation.

For our purposes, each intervention corresponds to a change in the current state and action distribution. This change in distribution can be realized as a change in the policy. Therefore, each policy  $\pi$  defines an ICP environment  $e$ . It can be shown that under Assumption 2 the direct causes, i.e., parents of  $x_{t+1}^i$ , define a valid support over invariant predictors, namely  $S^* = \mathbf{PA}(x_{t+1}^i)$ .<sup>2</sup> The key idea therefore is to make sure that in predicting each next state variable  $x_{t+1}^i$  we use only its set of invariant predictors and not all state variables and actions (see Figure 1). With this intuition, it becomes clearer why our original model learning problem is inherently tied with learning better representations, in that having access to a representation that discards excess information for each state variable (more formally, a causally invariant representation), would be more robust to spurious correlations and thus, at least in principle, lead to improved generalization performance across different parts of the state space. In fact, such a causally invariant representation obeys the properties of a model-invariant abstraction. Formally,

**Proposition 1.** *For the abstraction  $\phi_i(x) = [x]_{S_i}$ , where  $S_i = \mathbf{PA}(x_{t+1}^i)$ ,  $\phi_i$  is model-invariant.*

Proof is provided in Appendix 2. It now becomes easy to see that sparsity in dynamics is central to what we have discussed so far, since if we do not have sparsity, the causally invariant representation trivially reduces to the original state  $x$ , thus resulting in no state aggregation. However, when sparsity is present, following the above definition leads to a representation  $\phi$  such that any two components  $\phi_i$  and  $\phi_j$  are decorrelated, since each encodes information about a different subset of state variables. Finally, we show that learning a transition model over a model-invariant abstraction  $\phi$  and then planning over this model is optimal.

**Theorem 1.** (Value bound) *If  $\phi$  is an  $\epsilon_R, \epsilon_{i,P}$  approximate model-invariant abstraction on MDP  $M$ , and  $M_\phi$  is the abstract MDP formed using  $\phi$ , then we can bound the loss in the optimal state action value function in both the MDPs as:*

$$\begin{aligned} \left\| [Q_{M_\phi}^*]_M - Q_M^* \right\|_{2,\nu} &\leq \frac{\sqrt{C}}{1-\gamma} \left\| [Q_{M_\phi}^*]_M - \mathcal{T}[Q_{M_\phi}^*]_M \right\|_{2,\mu}, \\ \left\| [Q_{M_\phi}^*]_M - \mathcal{T}[Q_{M_\phi}^*]_M \right\|_{2,\mu} &\leq \epsilon_R + \gamma \left( \sum_{i=1}^d \epsilon_{i,P} \right) \frac{R_{\max}}{2(1-\gamma)}, \end{aligned}$$

where  $C$  refers to the concentrability coefficient as defined in [9]. Here, an admissible distribution  $\nu$  refers to any distribution that can be realized in the given MDP by following a policy for some timesteps, while  $\mu$  refers to the distribution from which the data is generated. Proof and all details surrounding the theoretical results are provided in Appendix 2. This result is important because we can follow this with standard sample complexity arguments that will have a logarithmic in  $|\phi|$  dependence, thus guaranteeing that learning in this abstract MDP is faster and only incurs the above described sub-optimality.

So far, we have embedded the RL model learning problem in the ICP framework. This highlights the connection between generalization issues in MBRL and arising spurious correlations in identifying the true causal predictors of each state variable. Furthermore, we have explored the state abstraction properties of the causally invariant representations which avoid spurious correlations. In the next section, we now show how ICP can be used as a sub-routine in learning a more generalized model in the simple setting of a linear MDP.

## 5 LINEAR CASE: CERTAINTY EQUIVALENCE

In the simpler setting of tabular RL, estimating the model using transition samples and then planning over the learned model is referred to as certainty equivalence [6]. Particularly for estimating the transition model, it considers the case where we are provided with  $n$  transition samples per state-action pair,  $(x_t, a_t)$  in the dataset  $D_{x,a}$ , and estimate the model as

$$P(x_{t+1}|x_t, a_t) = \frac{1}{n} \sum_{\bar{x} \in D_{x,a}} \mathbb{I}(\bar{x} = x_{t+1}).$$

<sup>2</sup>The proof follows directly by applying Proposition 1 of Peters et al. [46] (which itself follows from construction) to each state variable indexed by dimension  $i$

Now, when next state components do not depend on each other given the previous state and action (i.e., Assumption 1), we can re-write  $P(x_{t+1}|x_t, a_t)$  as  $\prod_i P(x_{t+1}^i|x_t, a_t)$ . Furthermore, if we know the causal parents of  $x_{t+1}^i$ , we can instead empirically estimate the true transition probabilities as

$$P(x_{t+1}^i|x_t, a_t) = P(x_{t+1}^i|\mathbf{PA}(x_{t+1}^i), a_t) = \frac{1}{nk} \sum_{\bar{x} \in D} \mathbb{I}(\bar{x} = x_{t+1}^i), \quad (1)$$

where  $D = \bigcup_{i=1}^k D_{x,a}$ ,  $x \in \phi_i^{-1}(\bar{x})$ . From Proposition 1, we know that such an invariant solution exists, and is defined by the causal parents of each state variable. Therefore, in the linear dynamics case, given data from multiple environments (different policies), we can use ICP to learn the causal parents of each state variable and then estimate the probability of a certain transition using Eq. 1<sup>3</sup>. We refer to this as the invariant model learner and detail the procedure in Algorithm 1. On the other hand, if we do extract the causal parent variables and instead use all state variables in Eq. 1, we would get the standard maximum likelihood (MLE) learner.

---

**Algorithm 1** Linear Model-Invariant MBRL

---

```

1: Input Replay buffer  $\mathcal{D}$  containing data from multiple policies/envs, confidence parameter  $\alpha$ ;
2: for state variable  $i = 1, \dots, d$  do
3:    $\mathcal{S}_i \leftarrow \text{ICP}(i, \mathcal{D}, \alpha)$ ; (Appendix ??)
4:   Estimate  $\hat{P}_i$  from  $\mathcal{D}$  using Eq. 1;
5: end for
6: Estimate transition probability kernel  $\hat{P} \leftarrow \prod_i \hat{P}_i$ 
7: for state  $s_j$ ,  $j = 1, \dots, N$  do
8:    $\pi_R(s_j) \leftarrow \text{Plan}(R, \hat{P}, s_j)$ 
9: end for
```

---

The invariance based solution avoids spurious correlations more than the MLE learner, resulting in better generalization. To see this, consider a simple linear MDP with three state variables  $(x^1, x^2, x^3)$ , each depending only on its own  $(\mathbf{PA}(x_{t+1}^i) = x_t^i)$ , and taking integer values between  $[-10, 10]$ . The exact details of the MDP are described in Appendix 3.1. We consider three different distributions corresponding to three different policies, each describing an ICP environment. In Table 1, we compare our invariant learner with a standard MLE learner

and show how their error with the true probability of transition varies as the number of samples grows.

| Samples | MLE         | Model-Invariance |
|---------|-------------|------------------|
| 100     | - ± -       | <b>9.3</b> ± 1.3 |
| 200     | 24.6 ± 9.23 | <b>5.7</b> ± 1.5 |
| 500     | 14.5 ± 2.75 | <b>2.7</b> ± 0.7 |
| 2000    | 9.6 ± 1.72  | <b>1.8</b> ± 0.3 |
| 5000    | 6.4 ± 1.46  | <b>1.6</b> ± 0.3 |

Table 1: **Linear MDP Transition Prediction Error.** Consider the simple linear MDP from Appendix 3.1. We compare the estimated transition probability of our invariant learner with the MLE learner (lower is better). The invariant learner converges faster and more stably to the true solution. Mean and std. err. over 15 random seeds. Order of magnitude of the errors is 1e-3.

Note that Table 1 represents the results for one environment, specified by a fixed policy that is used for data collection. If the policy changes, it would result in a different environment as described in Section 3. Our ideal scenario is to find a predictive model that is closest to the true model for all environments. We find that the invariant learner quickly converges to approximately the same solution across all training environments, with just a few data samples. On the other hand, the standard MLE learner results in different solutions for each training environment in the low data regime. The solution provided at test time in such a case is an average of all such solutions found during training, which is clearly off the true probability (higher error in Table 1).

It is worth noting that this example assumes linearity in dynamics, which allows us to use the ICP procedure from Peters et al. [46]. In the general non-linear case, this is not possible. To that end, in the next section we will describe a practical method that leverages ideas from self-supervised learning to exploit sparsity in an end-to-end manner.

## 6 NON-LINEAR CASE: LEARNING PRACTICAL MODEL-INVARIANT REPRESENTATIONS

We now introduce a practical algorithm for learning model-invariant representations where we relax the following assumptions: linearity in dynamics, having access to data from multiple environments,

---

<sup>3</sup>Using Theorem 1, we know that performing planning over this estimated dynamics model would be  $\epsilon$ -optimal.



**Algorithm 2** Non-linear Model-Invariant MBRL

- 1: **Input** Replay buffer  $\mathcal{D} = \emptyset$ ; Value and policy network parameters  $\theta_Q, \theta_\pi$ , model parameters  $\theta_r, \theta_f$  for any MBRL algorithm;
- 2: **for** environment steps  $t = 1, \dots, T$  **do**
- 3:   Take action  $a_t \sim \pi(\cdot|x_t)$ , observe  $r_t$  and  $x_{t+1}$ , and add to the replay buffer  $\mathcal{D}$ ;
- 4:   **for**  $M_{\text{model-free}}$  updates **do**
- 5:     Sample batch  $\{x_j, a_j, r_j, x_{j+1}\}_{j=1}^N$  from  $\mathcal{D}$ ;
- 6:     Run gradient update for the model free components of the algorithm (e.g.,  $\theta_\pi, \theta_Q$  etc.);
- 7:   **end for**
- 8:   **for**  $M_{\text{model}}$  updates **do**
- 9:     Sample batch  $\{x_j, a_j, r_j, x_{j+1}\}_{j=1}^N$  from  $\mathcal{D}$ ;
- 10:     Update reward model ( $\theta_r$ );
- 11:     Update invariant dynamics model:  $\theta_f \leftarrow \text{invariant\_update}(\theta_f, \nabla_{\theta_f} L_f)$  (Appendix 3.2 or Eq. 2);
- 12:   **end for**
- 13: **end for**

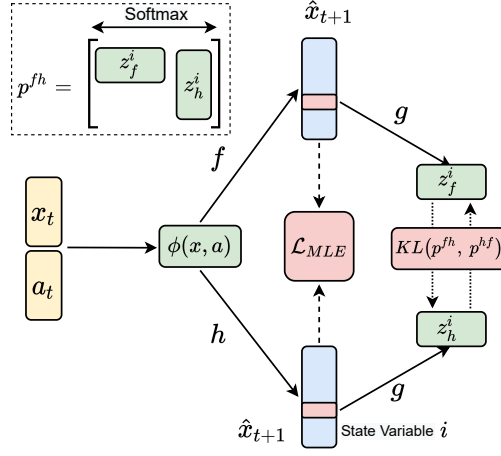

Figure 2: **Architecture for learning model-invariant representations.** Model-invariance uses two (or more) transition dynamics models, denoted by  $f$  and  $h$ , over a common representation  $\phi$ . The critic  $g$  provides a score for a chosen dimension/state variable of the output of  $f$  and  $h$  models.

and being in the strictly batch setting. Having connected the abstraction viewpoint to the problem of spurious correlations arising in dynamics models, we wish to come up with NN representations that abstract away irrelevant information on a *per-state-variable* level (i.e.,  $x_t^i$ , not  $x_t$ ) and learn them in an end-to-end manner. To that end, we view the task of learning such representations as a self-supervised objective where we want to be invariant to models that exhibit spurious correlations. Consider two (or more) randomly initialized and independently trained (on different samples) dynamics models attached to a common representation  $\phi$ . We can view these models as augmented versions of the *true* dynamics models since each model captures different spurious correlations. We must be invariant to augmentations in the model space on a *per-state-variable* level (since spurious correlations arise for individual state variable dynamics).

To instantiate this idea, we take inspiration from a recent method called ReLIC [40], which uses a contrastive loss [41] over augmented views of the same data sample and an invariance loss to enforce consistency. ReLIC was shown to be closely connected to doing causal interventions over input variables and enforcing invariance over certain functions (like data augmentations). Here we are exploiting the same connection, with additional modifications. Instead of using augmentations over inputs, we induce augmentations over *models* and then define the invariance loss for a particular dimension — the goal is to eliminate the contribution of spurious features when predicting a particular state variable. Note that doing exact causal interventions is not possible in the large state-action spaces in RL but we can still make strong connections to the causal literature and also use it in simpler settings, as we do in Section 5 (linear case) where we deploy exact invariance tools.

After randomizing two (or more) identical models at the start of training, a model is sampled randomly and is used for minimizing the standard MLE model predictive loss at each optimization step. Simultaneously, an invariance loss defined over the predictions of both models augments the MLE loss. The invariance loss enforces consistency in the prediction of both (all) models by *minimizing the difference in similarities between the prediction of one model w.r.t. the prediction of the other model and vice versa* (Eq. 2). This similarity is computed for a single (randomly selected) state variable at each optimization step, with the specifics being borrowed from the ReLIC objective Mitrovic et al. [40]. Finally, further consistency is encouraged because all models have a common representation with a bottleneck structure. Our implementation is detailed in Figure 2 and as pseudocode in Appendix 3.2. Although this method is designed to be robust to spurious correlations in dynamics models, in our experiments we will show that the representations learnt for each index  $i$ ,  $\phi_i$  actually end up being sparse, a property that motivated the model invariance abstraction back in Definition 1. The overall model invariance loss is:

$$\mathcal{L}_f = \mathbb{E}_{x \sim \mathcal{D}} \left[ \underbrace{\left( f(x_t, a_t) - x_{t+1} \right)^2}_{\text{MLE Loss}} + \underbrace{\text{KL}(p^{fh}, p^{hf})}_{\text{Invariance Loss}} \right], \quad p^{fh} = \text{softmax}(\psi^i(f, h)), \quad (2)$$

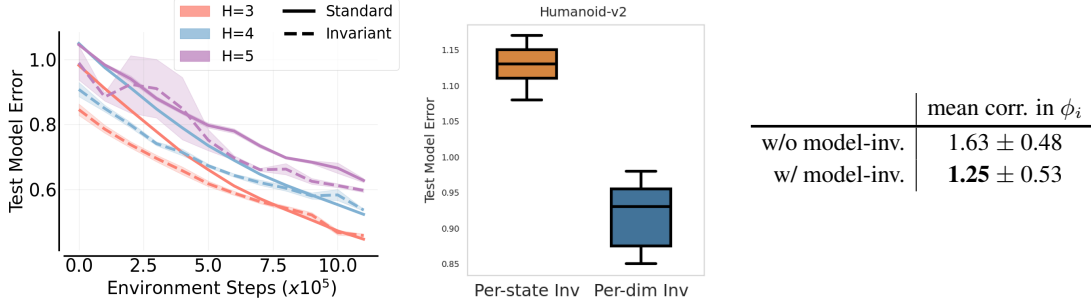

Figure 4: **Invariant Model Learning on Humanoid-v2.** **Left plot:** test model learning error for different horizon values. Mean and std. err. over 10 random seeds. **Middle plot:** modelling error when we enforce per-state vs per-dim invariance. **Table:** mean correlation metric; order of magnitude is  $10^3$ .

where  $\psi^i(f, h) = \left\langle g(f^i(x_t, a_t)), g(h^i(x_t, a_t)) \right\rangle$  is the cosine similarity between the predictions for the models  $f$  and  $h$  for the state variable indexed by  $i$ . The output of the inner product is normalized for each sample and thus the resulting vector  $g(f^i(x_t, a_t))$  is a probability distribution. In our implementation, the function  $g$  is a fully connected neural network and is used to project the outputs of the models  $f$  and  $h$ . It is often called the critic network in self-supervised learning losses [10]. Note that the matrix  $\psi^i$  is not symmetric since the values at any two symmetric indices are different (they are computed for different samples) — the KL loss remains well-defined.

We will use the invariant model learner described above within a model-based RL algorithm and compare its policy performance to a standard MLE based model learner. A general framework that uses an invariant model learner is outlined in Algorithm 2. For the purposes of this paper, we employ a simple actor-critic setup where the model is used to compute multi-step estimates of the  $Q$  value used by the actor learner. A specific instantiation of this idea of model value expansion is the SAC-SVG algorithm proposed in Amos et al. [2] (see Appendix 3.3 for details). It is important to note that the proposed version of model-invariance can be used in combination with any MBRL method and with any type of dynamics model architecture, such as ensembles or recurrent architectures.

## 7 EXPERIMENTS

**Presence of Spurious Correlations.** We first test the presence of spurious correlations in the Humanoid-v2 [53] task by choosing to predict a single dimension (the knee joint) in two contrasting settings; **1) No\_Mask:** when all state and action variables are provided as input and, **2) Mask:** when the state variables that are likely uncorrelated to the knee joint are masked (see Appendix 3.5). Having trained different models for the two settings, we observe that **1) No\_Mask:** performs worse than **2) Mask:**, for both horizon values in  $\{3, 5\}$  (see Figure 3). This verifies that there indeed is an invariant, causal set of parents among the state dimensions and that there could be some interference due to spurious correlations in 1), and thus, it performs worse than case 2). Furthermore, when the dimensions that are likely to be useful in predicting the knee joint are masked, then the model error is the highest (worst; not shown in figure). Note that since all variables are necessary for the task in hand, simply discarding some of them is a not a solution to the spurious correlation problem.

**Invariant Model Learning on Humanoid-v2.** We compare the invariant model learner to a standard MLE learner for the Humanoid-v2 task. To observe the effect of the invariance loss clearly, we decouple the model learning component from the policy optimization component by testing the model on data coming from the replay buffer of a pre-trained model-free SAC agent. Such a setup ensures that the changes in state distribution according to changes in policy are still present but any changes

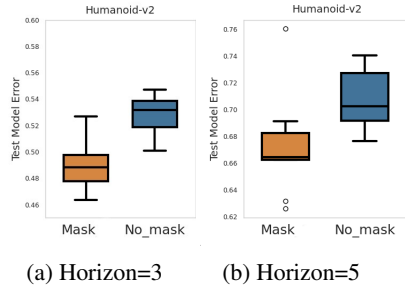

Figure 3: **Effect of spurious correlation** on model learning test loss of Humanoid-v2 for a single dimension (knee joint) with two settings: **Mask** and **No\_mask**. 10 seeds, 1 std. dev. shaded. Y-axis magnitude order is  $1e-3$ .

in the model do not actively affect this distribution, thus clearly reflecting the effect of model learning only.

We observe that our invariant model learner performs much better than the standard model learner, especially when the number of samples available is low, i.e., around the 200K to 500K mark (see Figure 4, left plot). As the number of samples increases, the performance between both models converges, just as observed in the tabular case. This is expected since in the infinite data regime, both solutions (MLE and invariance based) approach the true model. Furthermore, we observe that the number of samples it takes for convergence between the standard and the invariant model learners increases as the rollout horizon ( $H$  in Figure 4) of the model learner is increased. Next, we plot the test error when the invariance loss is computed for all state variables and compare it to when it is computed for a particular state variable (Figure 4, middle plot). We see that the per-state version performs worse than the per-state-variable or per-dim version, showing the importance of enforcing invariance at the state variable level. Finally, we test the mean correlation in the dimensions of the learnt representation  $\phi$  with and without model-invariance (Figure 4, right table). We see that the mean correlation is lower with model-invariance than without, suggesting that the practical algorithm does induce the sparsity property discussed in the earlier part of the paper.

| POPLIN      | Cheetah               | Walker               | Hopper                | Ant                   |
|-------------|-----------------------|----------------------|-----------------------|-----------------------|
| *PETS       | 2288 $\pm$ 510        | 282 $\pm$ 250        | 114 $\pm$ 311         | 1165 $\pm$ 113        |
| *POPLIN-A   | 1562 $\pm$ 568        | -105 $\pm$ 125       | 202 $\pm$ 481         | 1148 $\pm$ 219        |
| *POPLIN-P   | 4235 $\pm$ 566        | <b>597</b> $\pm$ 239 | <b>2055</b> $\pm$ 206 | 2330 $\pm$ 160        |
| *METRPO     | 2283 $\pm$ 450        | -1609 $\pm$ 328      | 1272 $\pm$ 250        | 282 $\pm$ 9           |
| *SAC        | 4035 $\pm$ 134        | -382 $\pm$ 424       | 2020 $\pm$ 346        | 836 $\pm$ 34          |
| SAC-SVG H-3 | 6530 $\pm$ 382        | 80 $\pm$ 472         | 1108 $\pm$ 263        | 2293 $\pm$ 397        |
| OURS H-3    | <b>7067</b> $\pm$ 269 | -150 $\pm$ 556       | <b>1724</b> $\pm$ 271 | <b>3124</b> $\pm$ 199 |

Table 2: **POPLIN Invariant MBRL performance** Invariant MBRL performance reported at 200k steps on four MuJoCo based domains from POPLIN [55]. \* represents performance reported by POPLIN. Standard error with 10 seeds reported. We bold the scores with larger mean values.

| MBPO        | Cheetah               | Walker                | Hopper                | Ant                   | Humanoid              |
|-------------|-----------------------|-----------------------|-----------------------|-----------------------|-----------------------|
| SAC-SVG H-3 | 8957 $\pm$ 532        | 3795 $\pm$ 503        | 3201 $\pm$ 101        | 3997 $\pm$ 153        | 1712 $\pm$ 415        |
| OURS H-3    | <b>9109</b> $\pm$ 334 | <b>3961</b> $\pm$ 239 | <b>3382</b> $\pm$ 84  | <b>4546</b> $\pm$ 286 | <b>2443</b> $\pm$ 561 |
| SAC-SVG H-4 | 8327 $\pm$ 870        | 3494 $\pm$ 392        | 3291 $\pm$ 232        | 4470 $\pm$ 307        | 2404 $\pm$ 495        |
| OURS H-4    | <b>9663</b> $\pm$ 487 | <b>4347</b> $\pm$ 136 | <b>3489</b> $\pm$ 19  | <b>4565</b> $\pm$ 221 | <b>3506</b> $\pm$ 538 |
| SAC-SVG H-5 | 5710 $\pm$ 1329       | 2773 $\pm$ 492        | 3059 $\pm$ 276        | 3808 $\pm$ 531        | 3190 $\pm$ 601        |
| OURS H-5    | <b>5796</b> $\pm$ 855 | <b>3326</b> $\pm$ 430 | <b>3207</b> $\pm$ 210 | <b>3817</b> $\pm$ 488 | <b>3446</b> $\pm$ 481 |

Table 3: **MBPO Invariant MBRL performance** Invariant MBRL performance reported at 200k steps on five MuJoCo based domains from MBPO [28]. Standard error with 10 seeds reported. We bold the scores with larger mean values.

**Invariant Model-based Reinforcement Learning.** Finally, we evaluate the invariant model learner within the policy optimization setting of SAC-SVG [2]. We compare the difference in performance to SAC-SVG when the horizon length is varied (see MBPO environments in Table 3 and Appendix 3.4) and then compare the performance of our method against multiple model based methods including PETS [11], POPLIN [55], METRPO [32], and the model free SAC [27] algorithm (see POPLIN environments in Table 2 and Appendix 3.4). The results in Table 3 show a consistent improvement in performance when the invariant model learner (OURS) is used instead of the standard model learner (SAC-SVG) across most tasks, including the Humanoid-v2. Furthermore, we see that as the horizon length is increased, the difference in performance between the invariant and standard learners increases for most tasks. A comparison of model training errors for both cases is provided in Table 5 in Appendix. We see a consistently higher training loss for the invariant learner, indicating less over fitting. Finally, in Table 2 we see that the invariant learner outperforms all six baselines on 3 out of 4 tasks, with the exception of Walker, where most methods fail to reach a positive score. Combining our invariant model learner with other policy optimization algorithms is therefore a promising direction for future investigation.



## 8 RELATED WORK

Planning based on structural assumptions on the underlying MDP have been explored in significant detail in the past [7]. The most closely related setting is of factored MDPs, but approaches that build on the factored MDP assumption have predominantly also assumed a known graph structure for the transition factorization [31, 50, 42]. The factored MDPs literature has carried two distinct ideas all along, one of sparsity and the other of factorized transitions/rewards. This paper focuses predominantly on sparsity. We rely on factorization for some theoretical results but the practical algorithm does not require factorization to work. Sparsity leads to the abstraction viewpoint introduced in this work, which allows us to scale our formalism to practical methods. It allows us to connect the initial formalism to the concrete problem of neural network generalization (without an abstraction-based formalism, it does not make sense to use neural networks).

On a separate axis, papers that deal with learning the graph structure and then doing RL [50, 16, 26], do so by constructing close to optimal transition functions, and then planning. In our practical method, we focus on only avoiding spurious correlations, which is computationally more efficient since by the time an exact model of the MDP can be learnt (usually done by checking all possible parent set candidates), most model-free methods can just learn the reward function and perform much better. Degris et al. [13] learn decision tree based models online while we focus on learning NN based models. Extending such exact methods to NN models remains an open problem. Guestrin et al. [25] state a similar idea to this work but simply assume that one is given basis functions that have limited scope (model-invariant abstractions).

As mentioned, other forms of state abstraction such as bisimulation [37, 58] do not consider sparsity whereas model-invariance does. Therefore, both forms of abstraction are in fact orthogonal to each other, and therefore can be combined on top of one another. In similar essence, a lot of works have proposed *value-aware* model learning objectives, which only model the minimal information required to predict the value function of the task [20, 17, 12]. This is again a complimentary idea to model-invariance, since we consider states spaces that are already minimal w.r.t. the value function, i.e., no task irrelevant information is present.

## 9 CONCLUSION AND FUTURE DIRECTIONS

This paper introduced a new type of state abstraction for MBRL that exploits the inherent sparsity present in many complex tasks. We first showed that a representation that only depends on the causal parents of each state variable follows this definition and is provably optimal. Following, we introduced a novel approach for learning model-invariant abstractions in practice, which can be plugged in any given MBRL method. Experimental results show that this approach measurably improves the generalization ability of the learnt models. This stands as an important first step to building more advanced algorithms with improved generalization for systems that possess sparse dynamics.

In terms of future work, there remain multiple exciting directions and open questions. First, to enable model-invariance, we could also look at other kind of approaches proposed recently such as the AND mask [43]. The AND mask specifically requires the data to be separated into multiple environments, and thus naturally suits the offline RL setting. Second, moving to pixel based input, the representation learning task becomes two-fold, including learning to abstract away the irrelevant information present in the pixels and then learning a model-invariant representation. Third, note that our theoretical results do not involve an explicit dependence on a sparsity measure, for example, the maximum number of parents any state variable could have. Including such a dependence would ensure tighter bounds. Fourth, it is worth asking how such an explicit constraint on model-invariance can perform as a standalone representation learning objective, considering the strong progress made by self-supervised RL.

## REFERENCES

- [1] Pieter Abbeel, Morgan Quigley, and Andrew Y Ng. Using inaccurate models in reinforcement learning. In *Proceedings of the 23rd international conference on Machine learning*, pp. 1–8, 2006.
- [2] Brandon Amos, Samuel Stanton, Denis Yarats, and Andrew Gordon Wilson. On the model-based stochastic value gradient for continuous reinforcement learning. *arXiv preprint arXiv:2008.12775*, 2020.
- [3] Martin Arjovsky, Léon Bottou, Ishaan Gulrajani, and David Lopez-Paz. Invariant risk minimization. *arXiv preprint arXiv:1907.02893*, 2019.
- [4] Christopher G Atkeson and Juan Carlos Santamaria. A comparison of direct and model-based reinforcement learning. In *Proceedings of international conference on robotics and automation*, volume 4, pp. 3557–3564. IEEE, 1997.
- [5] D. P. Bertsekas and D. A. Castanon. Adaptive aggregation methods for infinite horizon dynamic programming. *IEEE Transactions on Automatic Control*, 34(6):589–598, 1989. doi: 10.1109/9.24227.
- [6] Dimitri P. Bertsekas. *Dynamic Programming and Optimal Control*. Athena Scientific, 1st edition, 1995. ISBN 1886529124.
- [7] Craig Boutilier, Thomas Dean, and Steve Hanks. Decision-theoretic planning: Structural assumptions and computational leverage. *Journal of Artificial Intelligence Research*, 11:1–94, 1999.
- [8] Greg Brockman, Vicki Cheung, Ludwig Pettersson, Jonas Schneider, John Schulman, Jie Tang, and Wojciech Zaremba. Openai gym. *arXiv preprint arXiv:1606.01540*, 2016.
- [9] Jinglin Chen and Nan Jiang. Information-theoretic considerations in batch reinforcement learning. In *International Conference on Machine Learning*, pp. 1042–1051. PMLR, 2019.
- [10] Ting Chen, Simon Kornblith, Mohammad Norouzi, and Geoffrey Hinton. A simple framework for contrastive learning of visual representations. In *International Conference on Machine Learning (ICML)*, pp. 1597–1607, 2020.
- [11] Kurtland Chua, Roberto Calandra, Rowan McAllister, and Sergey Levine. Deep reinforcement learning in a handful of trials using probabilistic dynamics models. In *Advances in Neural Information Processing Systems (NIPS)*, pp. 4754–4765, 2018.
- [12] Brandon Cui, Yinlam Chow, and Mohammad Ghavamzadeh. Control-aware representations for model-based reinforcement learning. *arXiv preprint arXiv:2006.13408*, 2020.
- [13] Thomas Degris, Olivier Sigaud, and Pierre-Henri Wuillemin. Learning the structure of factored markov decision processes in reinforcement learning problems. In *Proceedings of the 23rd international conference on Machine learning*, pp. 257–264, 2006.
- [14] Marc Deisenroth and Carl E Rasmussen. PILCO: A model-based and data-efficient approach to policy search. In *International Conference on Machine Learning (ICML)*, pp. 465–472, 2011.
- [15] Marc Peter Deisenroth, Dieter Fox, and Carl Edward Rasmussen. Gaussian processes for data-efficient learning in robotics and control. *IEEE transactions on pattern analysis and machine intelligence*, 37(2):408–423, 2013.
- [16] Carlos Diuk, Lihong Li, and Bethany R Leffler. The adaptive k-meteorologists problem and its application to structure learning and feature selection in reinforcement learning. In *Proceedings of the 26th Annual International Conference on Machine Learning*, pp. 249–256, 2009.
- [17] Pierluca D’Oro, Alberto Maria Metelli, Andrea Tirinzoni, Matteo Papini, and Marcello Restelli. Gradient-aware model-based policy search. In *Proceedings of the AAAI Conference on Artificial Intelligence*, volume 34, pp. 3801–3808, 2020.

- [18] Frederick Eberhardt and Richard Scheines. Interventions and causal inference. *Philosophy of science*, 74(5):981–995, 2007.
- [19] Eyal Even-Dar and Yishay Mansour. Approximate equivalence of markov decision processes. In *Learning Theory and Kernel Machines*, pp. 581–594. Springer, 2003.
- [20] Amir-massoud Farahmand, Andre Barreto, and Daniel Nikovski. Value-aware loss function for model-based reinforcement learning. In *Artificial Intelligence and Statistics*, pp. 1486–1494. PMLR, 2017.
- [21] Vladimir Feinberg, Alvin Wan, Ion Stoica, Michael I Jordan, Joseph E Gonzalez, and Sergey Levine. Model-based value expansion for efficient model-free reinforcement learning. In *International Conference on Machine Learning (ICML)*, 2018.
- [22] Chelsea Finn, Xin Yu Tan, Yan Duan, Trevor Darrell, Sergey Levine, and Pieter Abbeel. Deep spatial autoencoders for visuomotor learning. In *2016 IEEE International Conference on Robotics and Automation (ICRA)*, pp. 512–519. IEEE, 2016.
- [23] Anirudh Goyal and Yoshua Bengio. Inductive biases for deep learning of higher-level cognition. *arXiv preprint arXiv:2011.15091*, 2020.
- [24] Carlos Guestrin, Daphne Koller, and Ronald Parr. Max-norm projections for factored MDPs. In *International Joint Conferences on Artificial Intelligence (IJCAI)*, volume 1, pp. 673–682, 2001.
- [25] Carlos Guestrin, Daphne Koller, Ronald Parr, and Shobha Venkataraman. Efficient solution algorithms for factored mdps. *Journal of Artificial Intelligence Research*, 19:399–468, 2003.
- [26] Zhaohan Daniel Guo and Emma Brunskill. Sample efficient feature selection for factored mdps. *arXiv preprint arXiv:1703.03454*, 2017.
- [27] Tuomas Haarnoja, Aurick Zhou, Pieter Abbeel, and Sergey Levine. Soft actor-critic: Off-policy maximum entropy deep reinforcement learning with a stochastic actor. In *International Conference on Machine Learning*, pp. 1861–1870. PMLR, 2018.
- [28] Michael Janner, Justin Fu, Marvin Zhang, and Sergey Levine. When to trust your model: Model-based policy optimization. In *Advances in Neural Information Processing Systems*, pp. 12519–12530, 2019.
- [29] Nan Jiang. Notes on state abstractions, 2018. URL <http://nanjiang.cs.illinois.edu/files/cs598/note4.pdf>.
- [30] Anders Jonsson and Andrew Barto. Causal graph based decomposition of factored mdps. *J. Mach. Learn. Res.*, 7:2259–2301, December 2006. ISSN 1532-4435.
- [31] Michael Kearns and Daphne Koller. Efficient reinforcement learning in factored MDPs. In *International Joint Conferences on Artificial Intelligence (IJCAI)*, volume 16, pp. 740–747, 1999.
- [32] Thanard Kurutach, Ignasi Clavera, Yan Duan, Aviv Tamar, and Pieter Abbeel. Model-ensemble trust-region policy optimization. *arXiv preprint arXiv:1802.10592*, 2018.
- [33] Balaji Lakshminarayanan, Alexander Pritzel, and Charles Blundell. Simple and scalable predictive uncertainty estimation using deep ensembles. *arXiv preprint arXiv:1612.01474*, 2016.
- [34] Nathan Lambert, Brandon Amos, Omry Yadan, and Roberto Calandra. Objective mismatch in model-based reinforcement learning. *Learning for Dynamics and Control (L4DC)*, pp. 761–770, 2020. URL <http://arxiv.org/abs/2002.04523>.
- [35] Alex X Lee, Anusha Nagabandi, Pieter Abbeel, and Sergey Levine. Stochastic latent actor-critic: Deep reinforcement learning with a latent variable model. *arXiv preprint arXiv:1907.00953*, 2019.
- [36] Sergey Levine, Chelsea Finn, Trevor Darrell, and Pieter Abbeel. End-to-end training of deep visuomotor policies. *The Journal of Machine Learning Research*, 17(1):1334–1373, 2016.

- [37] Lihong Li. *A unifying framework for computational reinforcement learning theory*. PhD thesis, Rutgers University-Graduate School-New Brunswick, 2009.
- [38] Dipendra Misra, Mikael Henaff, Akshay Krishnamurthy, and John Langford. Kinematic state abstraction and provably efficient rich-observation reinforcement learning. In *International Conference on Machine Learning (ICML)*, pp. 6961–6971, 2020.
- [39] Dipendra Misra, Qinghua Liu, Chi Jin, and John Langford. Provable rich observation reinforcement learning with combinatorial latent states. In *International Conference on Learning Representations (ICLR)*, 2021. URL <https://openreview.net/forum?id=hx1IXFHaw7R>.
- [40] Jovana Mitrovic, Brian McWilliams, Jacob Walker, Lars Buesing, and Charles Blundell. Representation learning via invariant causal mechanisms. *arXiv preprint arXiv:2010.07922*, 2020.
- [41] Aaron van den Oord, Yazhe Li, and Oriol Vinyals. Representation learning with contrastive predictive coding. *arXiv preprint arXiv:1807.03748*, 2018.
- [42] Ian Osband and Benjamin Van Roy. Near-optimal reinforcement learning in factored mdps. In *Advances in Neural Information Processing Systems*, pp. 604–612, 2014.
- [43] Giambattista Parascandolo, Alexander Neitz, Antonio Orvieto, Luigi Gresele, and Bernhard Schölkopf. Learning explanations that are hard to vary. *arXiv preprint arXiv:2009.00329*, 2020.
- [44] Judea Pearl. *Causality*. Cambridge university press, 2009.
- [45] Judea Pearl et al. Models, reasoning and inference. *Cambridge, UK: CambridgeUniversityPress*, 19, 2000.
- [46] Jonas Peters, Peter Bühlmann, and Nicolai Meinshausen. Causal inference using invariant prediction: identification and confidence intervals. *arXiv preprint arXiv:1501.01332*, 2015.
- [47] Martin L Puterman. *Markov decision processes: discrete stochastic dynamic programming*. John Wiley & Sons, 2014.
- [48] Balaraman Ravindran and Andrew G Barto. *An algebraic approach to abstraction in reinforcement learning*. PhD thesis, University of Massachusetts at Amherst, 2004.
- [49] Elan Rosenfeld, Pradeep Ravikumar, and Andrej Risteski. The risks of invariant risk minimization. *arXiv preprint arXiv:2010.05761*, 2020.
- [50] Alexander L Strehl, Carlos Diuk, and Michael L Littman. Efficient structure learning in factored-state mdps. In *AAAI*, volume 7, pp. 645–650, 2007.
- [51] Richard S Sutton. Dyna, an integrated architecture for learning, planning, and reacting. *ACM Sigart Bulletin*, 2(4):160–163, 1991.
- [52] Yi Tian, Jian Qian, and Suvrit Sra. Towards minimax optimal reinforcement learning in factored markov decision processes. *Advances in Neural Information Processing Systems*, 33, 2020.
- [53] Emanuel Todorov, Tom Erez, and Yuval Tassa. Mujoco: A physics engine for model-based control. In *2012 IEEE/RSJ International Conference on Intelligent Robots and Systems*, pp. 5026–5033. IEEE, 2012.
- [54] Hado P van Hasselt, Matteo Hessel, and John Aslanides. When to use parametric models in reinforcement learning? *Advances in Neural Information Processing Systems*, 32:14322–14333, 2019.
- [55] Tingwu Wang and Jimmy Ba. Exploring model-based planning with policy networks. *arXiv preprint arXiv:1906.08649*, 2019.
- [56] Ziping Xu and Ambuj Tewari. Near-optimal reinforcement learning in factored mdps: Oracle-efficient algorithms for the non-episodic setting. 2020.

- [57] Amy Zhang, Clare Lyle, Shagun Sodhani, Angelos Filos, Marta Kwiatkowska, Joelle Pineau, Yarin Gal, and Doina Precup. Invariant causal prediction for block MDPs. In *International Conference on Machine Learning (ICML)*, pp. 11214–11224, 13–18 Jul 2020.
- [58] Amy Zhang, Rowan Thomas McAllister, Roberto Calandra, Yarin Gal, and Sergey Levine. Invariant representations for reinforcement learning without reconstruction. In *International Conference on Learning Representations (ICLR)*, 2021. URL <https://openreview.net/forum?id=-2FCwDKRREu>.



# Appendix

## 1 WHY CAUSAL INVARIANCE?

Out of distribution (OOD) generalization has been attributed to learnt correlations that do not follow the underlying causal structure of the system. These are referred to as spurious correlations. With the use of deep neural networks, spurious correlations can arise due to 1) the way we collect data, or selection bias, 2) overparameterization of the neural networks, and 3) presence of irrelevant information in the data (ex. the background might be irrelevant for an object classification task). For the setting in this paper, such issues are relevant since we use NNs to learn the dynamics model of the RL environment. Even if these issues are attended to, spurious correlation could still arise. However, this time it would be due to the causal structure assumed and not the modelling technique (NNs) we use over it. Two such causes are 4) hidden confounders in the causal graph and 5) conditioning on anti-causal parts of input  $x$ . For our case, 4) could correspond to a hidden non-stationarity in the system such as the friction coefficient between the robot and the floor. Since we are only concerned with the  $x_t$  to  $x_{t+1}$  causal diagram, 5) may not be as apparent. Nevertheless, we include it for completeness. Therefore, in principle, choosing the right variables and deploying techniques that discover an invariant  $Y$  conditioned on a given  $X$  helps us avoid spurious correlations. This in turn leads to better OOD generalization.

## NOTES ON ASSUMPTIONS

- There is a linearity assumption on the dynamics that is implicitly placed when we borrow the generalization results of Peters et al. [46]. These ensure that given data divided into multiple environments (minimum 2) (in our case that refers to data from multiple single policies), the causal representation results in a model that generalizes over all environments. When the dynamics are non-linear, Arjovsky et al. [3] showed that a similar argument toward generalization can still be made, with the added requirement of having data from at least a fixed amount ( $n_e \geq 2$ ) of environments. However, recent work [49] has argued that such an analysis is not accurate and thus more investigation is required to ensure OOD generalization. For the proof of concept experiment in Section 5, the dynamics are linear and thus we can deploy ICP for learning the causal parents of each state variable and ensure that the zero-shot generalization shown actually persists for any arbitrarily different policy from the ones used for training the invariant learner. When we move to Section 6 we do away with this assumption since the dynamics are no longer linear. Moreover, we do not restrict ourselves to a multiple environment based regime, the likes of which are required by Peters et al. [46].
- The transition factorization assumption, i.e., Assumption 1, seems like a strict condition in theory when we move to complex domains, however, it is in fact a natural outcome of how we model the agent dynamics in practice. In practice, each state variable of the next state  $x_{t+1}$  is set to only be dependent on the previous state  $x_t$  and action  $a_t$ . We can see this for example in neural network based dynamics models where the next state as a whole (all state variables simultaneously) is predicted given the previous state and action. Therefore, even though it may seem as an over constraining assumption, in practice it is present by default. In fact, this shows that we should focus more on theoretical results that build on assumptions like transition factorization.
- A constraint on the exploration issue is usually dealt with by the concentrability assumption in literature. A recent method to get around such an assumption is by coupling the policy optimization algorithm with an exploration algorithm that maintains a set of exploratory policies (*policy cover* in Misra et al. [38]) which slowly keeps expanding.
- When describing the practical invariant model learner (Section 6), we do not explicitly focus on finding the exact causal parents for each state variable. On the other hand, we resort to forcing such a constraint implicitly by describing a direct, differentiable invariance-based loss. One benefit of this approach is that the overall method remains end-to-end. The downside of course is that we do not always ensure that the right set of causal parents is found.

## 2 PROOFS

**Proposition 2.** *For the abstraction  $\phi_i(x) = [x]_{S_i}$ , where  $S_i = \mathbf{PA}(x_{t+1}^i)$ ,  $\phi_i$  is model-invariant. Furthermore, if  $\phi$  follows such a definition for all state variables indexed by  $i$ ,  $\phi$  is a reward free model irrelevant state abstraction.*

*Proof.* We first prove that  $\phi_i$  is model-invariant. In the case where  $\phi_i(x) = \phi_i(x')$  for some state variable indexed by  $i$ , we have:

$$\begin{aligned} P(\bar{x}^i|x, a) &= P(\bar{x}^i|[x]_{S_i}, a) \\ &= P(\bar{x}^i|\phi_i(x), a) \\ &= P(\bar{x}^i|\phi_i(x'), a). \end{aligned}$$

Following the same steps backwards for  $\phi_i(x')$  concludes the proof.

We now prove the latter statement in the theorem. Note that for such a statement to be meaningful, we require that the state space  $\mathcal{X}$  includes some irrelevant state variables for the downstream task in hand. For example, we could have some unnecessary noise variables appended to the full state variables. In such a case, the full state variables are relevant for the downstream task whereas the noise variables are irrelevant for the downstream task. Now, if  $\phi(x) = \phi(x')$ , i.e.,  $\phi_i(x) = \phi_i(x')$  for all relevant state variables indexed by  $i$ ,  $\phi$  is a reward free model irrelevant state abstraction, i.e.,

$$\sum_{\bar{x} \in \phi^{-1}(s)} P(\bar{x}|x, a) = \sum_{\bar{x} \in \phi^{-1}(s)} P(\bar{x}|x', a), \quad (3)$$

where  $s$  is the abstract state that  $\phi$  maps to. With this note, the proof for the latter statement follows directly from Theorem 1 in Zhang et al. [57].

**On the absence of irrelevant state variables:** The condition  $\phi(x^1) = \phi(x^2)$  is quite strict if we assume the absence of irrelevant state variables (if no such variables are present, then  $x^1$  has to be equal to  $x^2$  for this condition to be met, which is not meaningful).

**Extending to model-invariance grounded in reward:** Notice that Definition 1 is reward free, and is grounded in the next state  $\bar{x}$ . We could instead extend this to a definition which is grounded in the reward. Particularly,

**Definition 2.** (*Reward Grounded Model Invariant Abstraction*)  $\phi_i$  is reward grounded model-invariant if for any  $x, x', \bar{x} \in \mathcal{X}, a \in \mathcal{A}$ ,  $\phi_i(x) = \phi_i(x')$  if and only if

$$\begin{aligned} R_i(x, a) &= R_i(x', a) \\ \sum_{\bar{x} \in \phi_i^{-1}(s_i)} P(\bar{x}|x, a) &= \sum_{\bar{x} \in \phi_i^{-1}(s_i)} P(\bar{x}|x', a), \end{aligned}$$

We can show that the causal representation of  $\phi$  is a reward free version of the above defined model-invariance abstraction (Definition 2).

**Proposition 3.** *For the abstraction  $\phi_i(x) = [x]_{S_i}$ , where  $S_i = \mathbf{PA}(x_{t+1}^i)$ ,  $\phi_i$  is a reward free version of Definition 2.*

*Proof.* Now, when  $\phi_i(x) = \phi_i(x')$  for a specific state variable indexed by  $i$ , we have:

$$\begin{aligned}
\sum_{\bar{x} \in \phi_i^{-1}(s)} P(\bar{x}|x, a) &= \sum_{\bar{x} \in \phi_i^{-1}(s)} \prod_{k=1}^d P(\bar{x}^k|x, a) \\
&= \sum_{\bar{x} \in \phi_i^{-1}(s)} P(\bar{x}^i|[x]_{S_i}, a) \prod_{k=1}^d P(\bar{x}^{k \neq i, i, k \in [d]}|x, a) \\
&= f(s, \phi_i(x), a) \sum_{\bar{x} \in \phi_i^{-1}(s)} P(\{\bar{x}\}^{k \neq i, i, k \in [d]}|x, a) \\
&= f(s, \phi_i(x), a) \\
&= f(s, \phi_i(x'), a).
\end{aligned}$$

, where we use  $[d]$  to denote the set  $\{1, \dots, d\}$  and  $f$  is some function that depends only on the abstraction  $\phi_i$ , action  $a$ , and the abstract state  $s$ . Following the same steps backwards concludes the proof.

**Lemma 1.** (Model Error Bound) Let  $\phi$  be an  $\epsilon_{i,P}$ -approximate model-invariant abstraction on MDP  $M$ . Given any distributions  $p_{s_i} : s_i \in \phi_i(\mathcal{X})$  where  $p_{s_i}$  is supported on  $\phi^{-1}(s_i)$  and  $p_s = \prod_{i=1}^d p_{s_i}$ , we define  $M_\phi = (\phi(\mathcal{X}), \mathcal{A}, P_\phi, R_\phi, \gamma)$  where  $P_\phi(s, a) = \mathbb{E}_{x \sim p_s}[P(\cdot|x, a)]$ . Then for any  $x \in \mathcal{X}$ ,  $a \in \mathcal{A}$ ,

$$\|P_\phi(s, a) - \Phi P(x, a)\| \leq \sum_{i=1}^d \epsilon_{i,P}.$$

*Proof.* Consider any  $x, a$  and let  $q_{x^i} := \Phi_i P(x, a)$ , where we have  $\|q_{x^i} - q_{\bar{x}^i}\| \leq \epsilon_{i,P}$  if  $\phi_i(x) = \phi_i(\bar{x})$ .

$$\begin{aligned}
\|P_\phi(s, a) - \Phi P(x, a)\| &= \left\| \sum_{\bar{x} \in \phi^{-1}(s)} p_s(\bar{x}) P(\cdot|\bar{x}, a) - \Phi P(x, a) \right\| \\
&= \left\| \sum_{\bar{x} \in \phi^{-1}(s)} p_s(\bar{x}) P(\cdot|\bar{x}, a) - \prod_{i=1}^d \Phi_i P(x, a) \right\| \\
&= \left\| \sum_{\bar{x} \in \phi^{-1}(s)} p_s(\bar{x}) \prod_{i=1}^d q_{\bar{x}^i} - \prod_{i=1}^d q_{x^i} \right\| \\
&= \left\| \sum_{\bar{x} \in \phi^{-1}(s)} p_s(\bar{x}) \left( \prod_{i=1}^d q_{\bar{x}^i} - \prod_{i=1}^d q_{x^i} \right) \right\| \\
&\leq \sum_{\bar{x} \in \phi^{-1}(s)} p_s(\bar{x}) \left\| \prod_{i=1}^d q_{\bar{x}^i} - \prod_{i=1}^d q_{x^i} \right\|.
\end{aligned}$$

We now use the following inequality:

$$\begin{aligned}
\|AB - CD\| &= \|AB - AD + AD - CD\| \\
&= \|A(B - D) + (A - C)D\| \\
&\leq \|A(B - D)\| + \|(A - C)D\| && \text{(Triangle inequality)} \\
&\leq \|A\|_\infty \|B - D\|_1 + \|A - C\|_1 \|D\|_\infty && \text{(Holder's inequality).}
\end{aligned}$$

The  $\infty$ -norm of a probability distribution is 1. Apply this result to the above expression  $d$  times,

$$\begin{aligned}
\|P_\phi(x, a) - \Phi P(x, a)\| &\leq \sum_{\bar{x} \in \phi^{-1}(s)} p_s(\bar{x}) \left\| \prod_{i=1}^d q_{\bar{x}^i} - \prod_{i=1}^d q_{x^i} \right\| \\
&\leq \sum_{\bar{x} \in \phi^{-1}(s)} p_s(\bar{x}) \left( \left\| \prod_{i=1}^{d-1} q_{\bar{x}^i} \right\|_\infty \|q_{\bar{x}^d} - q_{x^d}\|_1 + \left\| \prod_{i=1}^{d-1} q_{\bar{x}^i} - \prod_{i=1}^{d-1} q_{x^i} \right\|_1 \|q_{x^d}\|_\infty \right) \\
&\vdots \\
&\leq \sum_{\bar{x} \in \phi^{-1}(s)} p_s(\bar{x}) \sum_{i=1}^d \epsilon_{i,P} \\
&= \sum_{i=1}^d \epsilon_{i,P}.
\end{aligned}$$

**Theorem 1.** (Value bound) *If  $\phi$  is an  $\epsilon_R, \epsilon_{i,P}$  approximate model-invariant abstraction on MDP  $M$ , and  $M_\phi$  is the abstract MDP formed using  $\phi$ , then we can bound the loss in the optimal state action value function in both the MDPs as:*

$$\begin{aligned}
\|[Q_{M_\phi}^*]_M - Q_M^*\|_{2,\nu} &\leq \frac{\sqrt{C}}{1-\gamma} \|[Q_{M_\phi}^*]_M - \mathcal{T}[Q_{M_\phi}^*]_M\|_{2,\mu} \\
\|[Q_{M_\phi}^*]_M - \mathcal{T}[Q_{M_\phi}^*]_M\|_{2,\mu} &\leq \epsilon_R + \gamma \left( \sum_{i=1}^d \epsilon_{i,P} \right) R_{max} / (2(1-\gamma))
\end{aligned}$$

Note that this theorem deals with the batch setting, where we are given a batch of data and are tasked at learning only using this data, without allowing any direct interaction with the MDP. We use the concentratability coefficient as defined in Assumption ??, i.e., there exists a  $C$  such that for any admissible distribution  $\nu$ :

$$\forall (x, a) \in \mathcal{X} \times \mathcal{A}, \quad \frac{\nu(x, a)}{\mu(x, a)} < C.$$

Here, we abuse  $\mu$  to represent the distribution the data comes from instead of standard notation representing the starting state distribution. Now,

$$\begin{aligned}
\|[Q_{M_\phi}^*]_M - Q_M^*\|_{2,\nu} &= \|[Q_{M_\phi}^*]_M - \mathcal{T}[Q_{M_\phi}^*]_M + \mathcal{T}[Q_{M_\phi}^*]_M - Q_M^*\|_{2,\nu} \\
&\leq \|[Q_{M_\phi}^*]_M - \mathcal{T}[Q_{M_\phi}^*]_M\|_{2,\nu} + \|\mathcal{T}[Q_{M_\phi}^*]_M - \mathcal{T}Q_M^*\|_{2,\nu} \\
&\leq \sqrt{C} \|[Q_{M_\phi}^*]_M - \mathcal{T}[Q_{M_\phi}^*]_M\|_{2,\mu} + \|\mathcal{T}[Q_{M_\phi}^*]_M - \mathcal{T}Q_M^*\|_{2,\nu} \quad (3)
\end{aligned}$$

Let us consider the second term:

$$\begin{aligned}
\left\| \mathcal{T}[Q_{M_\phi}^*]_M - \mathcal{T}Q_M^* \right\|_{2,\nu}^2 &= \mathbb{E}_{(x,a) \sim \nu} \left[ \left( \mathcal{T}[Q_{M_\phi}^*]_M(x,a) - \mathcal{T}Q_M^*(s,a) \right)^2 \right] \\
&= \mathbb{E}_{(x,a) \sim \nu} \left[ \left( \gamma \mathbb{E}_{x' \sim P(x,a)} [\max_a [Q_{M_\phi}^*]_M(x',a) - \max_a Q_M^*(x',a)] \right)^2 \right] \\
&\leq \mathbb{E}_{(x,a) \sim \nu} \left[ \gamma^2 \mathbb{E}_{x' \sim P(x,a)} \left( \max_a [Q_{M_\phi}^*]_M(x',a) - \max_a Q_M^*(x',a) \right)^2 \right] \\
&\leq \gamma^2 \mathbb{E}_{(x,a) \sim \nu} \mathbb{E}_{x' \sim P(x,a)} \left[ \max_a \left( [Q_{M_\phi}^*]_M(x',a) - Q_M^*(x',a) \right)^2 \right] \\
&\leq \max_\nu \left[ \gamma^2 \mathbb{E}_{(x,a) \sim \nu} \mathbb{E}_{x' \sim P(x,a)} \left[ \max_a \left( [Q_{M_\phi}^*]_M(x',a) - Q_M^*(x',a) \right)^2 \right] \right] \\
&\leq \max_\nu \left[ \gamma^2 \mathbb{E}_{(x,a) \sim \nu} \left[ \left( [Q_{M_\phi}^*]_M(x',a) - Q_M^*(x',a) \right)^2 \right] \right] \\
&= \max_\nu \gamma^2 \left\| [Q_{M_\phi}^*]_M - Q_M^* \right\|_{2,\nu}^2
\end{aligned}$$

where the last inequality follows because the two terms inside the expectation only depend on the next state  $x'$  and the next action  $a$  which can only be less than the value for  $x, a \sim \nu$  since we maximize over it.

Plugging this back in (3):

$$\begin{aligned}
\left\| [Q_{M_\phi}^*]_M - Q_M^* \right\|_{2,\nu} &\leq \sqrt{C} \left\| [Q_{M_\phi}^*]_M - \mathcal{T}[Q_{M_\phi}^*]_M \right\|_{2,\mu} + \max_\nu \gamma \left\| [Q_{M_\phi}^*]_M - Q_M^* \right\|_{2,\nu} \\
\max_\nu \left\| [Q_{M_\phi}^*]_M - Q_M^* \right\|_{2,\nu} &\leq \sqrt{C} \left\| [Q_{M_\phi}^*]_M - \mathcal{T}[Q_{M_\phi}^*]_M \right\|_{2,\mu} + \max_\nu \gamma \left\| [Q_{M_\phi}^*]_M - Q_M^* \right\|_{2,\nu} \\
\max_\nu \left\| [Q_{M_\phi}^*]_M - Q_M^* \right\|_{2,\nu} &\leq \frac{\sqrt{C}}{1-\gamma} \left\| [Q_{M_\phi}^*]_M - \mathcal{T}[Q_{M_\phi}^*]_M \right\|_{2,\mu}
\end{aligned}$$

Since  $\left\| [Q_{M_\phi}^*]_M - Q_M^* \right\|_{2,\nu} \leq \max_\nu \left\| [Q_{M_\phi}^*]_M - Q_M^* \right\|_{2,\nu}$ , we have:

$$\left\| [Q_{M_\phi}^*]_M - Q_M^* \right\|_{2,\nu} \leq \frac{\sqrt{C}}{1-\gamma} \left\| [Q_{M_\phi}^*]_M - \mathcal{T}[Q_{M_\phi}^*]_M \right\|_{2,\mu}$$

Now, we prove the second statement:

$$\begin{aligned}
\left\| [Q_{M_\phi}^*]_M - \mathcal{T}[Q_{M_\phi}^*]_M \right\|_{2,\mu} &\leq \left\| [Q_{M_\phi}^*]_M - \mathcal{T}[Q_{M_\phi}^*]_M \right\|_\infty \\
&= \left\| [\mathcal{T}_{M_\phi} Q_{M_\phi}^*]_M - \mathcal{T}[Q_{M_\phi}^*]_M \right\|_\infty \\
&= \sup_{x,a} |R_\phi(\phi(x), a) + \gamma \langle P_\phi(\phi(x), a), V_{M_\phi}^* \rangle - R(x, a) - \gamma \langle P(x, a), [V_{M_\phi}^*]_M \rangle| \\
&\leq \epsilon_R + \gamma \sup_{x,a} |\langle P_\phi(\phi(x), a), V_{M_\phi}^* \rangle - \langle P(x, a), [V_{M_\phi}^*]_M \rangle| \\
&= \epsilon_R + \gamma \sup_{x,a} |\langle P_\phi(\phi(x), a), V_{M_\phi}^* \rangle - \langle \Phi P(x, a), V_{M_\phi}^* \rangle| \\
&\leq \epsilon_R + \gamma \epsilon_P \left\| V_{M_\phi}^* - \frac{R_{\max}}{2(1-\gamma)} \mathbf{1} \right\|_\infty \\
&\leq \epsilon_R + \gamma \epsilon_P R_{\max} / (2(1-\gamma)) \\
&= \epsilon_R + \gamma \left( \sum_{i=1}^d \epsilon_{i,P} \right) R_{\max} / (2(1-\gamma))
\end{aligned}$$



### 3 IMPLEMENTATION DETAILS

#### 3.1 LINEAR MDP

We consider a discrete MDP with three state variables  $x^1, x^2, x^3$ , all taking values in  $[-10, 10]$  and a single action  $a$ . The transition probabilities of each  $x_t^i$  depend only on  $x_{t-1}^i$  and the action  $a$ . We define the three policies/environments as ones that lead to soft interventions (interventions on the noise variables) on the three state variables individually. Each episode ends after 10 time steps so as to have data from multiple trajectories, as is the case for more complex MDPs. We note that around 1000 samples of data from each environment is enough for ICP to extract the correct parent sets for each state variable. Next, we estimate the transition probabilities for a particular transition using the invariant as well as the MLE based estimators and plot them against the number of samples used.

#### 3.2 PYTORCH-LIKE PSEUDOCODE FOR LEARNING MODEL-INVARIANT REPRESENTATIONS

---

```

for x in loader: # load a minibatch x with n samples
    # independent predictions from two randomly initiated models
    z1, z2 = f(x), h(x) # f: model_1, h: model_2
    # pick random dimension
    dim = rand(z1.shape)

    pred_1 = g(cat(z1[dim], one_hot(dim))) # g: critic
    pred_2 = g(cat(z2[dim], one_hot(dim)))
    p1, p2 = InvLoss(pred_1, pred_2)

    L = KL(p1, p2)

    L.backward()
    update(f, h, g)

def InvLoss(pred_1, pred_2):
    phi_1 = pred_1 * pred_2.T.detach()
    phi_2 = pred_2 * pred_1.T.detach()

    # matrix of inner product of 2-norm of pred_1 rows with pred_2 columns
    norm_l2 = normalize(pred_1, pred_2)
    phi_1 = phi_1 / norm_l2
    phi_2 = phi_2 / norm_l2.T

    p1 = F.softmax(phi_1, dim=-1)
    p2 = F.softmax(phi_2, dim=-1)
    return p1, p2

def KL(p1, p2):
    p2 = p2.detach()
    return (p1 * (p1 / p2).log()).sum(dim=-1).mean()

```

---

#### 3.3 SAC-SVG ALGORITHM

The SAC-SVG algorithm is presented in Amos et al. [2] and is based on the idea of model-based value expansion (MVE) [21]. MVE uses the model to expand the value function to compute a multi-step estimate which a model-free base algorithm uses for policy optimization. In SAC-SVG, the model-free base learner is a SAC agent and the multi-step estimates correspond to that of the  $Q$  value used by the SAC actor.

$$\mathcal{L}_{\alpha, \pi}^{\text{SAC-SVG}} = \mathbb{E}_{x \sim \mathcal{D}, a \sim \pi} - Q_{0:H}^{\alpha, \pi}(x, a),$$

where  $\alpha$  is the entropy temperature parameter of SAC. Note that for  $H = 0$ , SAC-SVG is equivalent to SAC, since the model is no longer used for updating the actor. Thus the impact of the model on the final algorithm performance is through the horizon parameter  $H$ . Regarding the model learner, SAC-SVG uses a recurrent deterministic model which takes as input the current state and a hidden state to output the next state for a given horizon step  $H$ . The other popular alternative is to use an ensemble of probabilistic model learners, as done in Chua et al. [11].

| Hyperparameter                          | Value                                             |
|-----------------------------------------|---------------------------------------------------|
| Replay buffer size                      | 1000000                                           |
| Initial temperature ( $\alpha$ )        | 0.1                                               |
| Learning rate                           | $1e-4$ SAC actor and critic; $1e-3$ Model learner |
| SAC Critic $\tau$                       | 0.005                                             |
| Discount $\gamma$                       | 0.99                                              |
| SAC batch size                          | 1024                                              |
| Model batch size                        | 512                                               |
| Optimizer                               | Adam                                              |
| Model updates per env step              | 4                                                 |
| Initial steps                           | 1000                                              |
| Number of encoder hidden layers (Model) | 2                                                 |
| Number of decoder hidden layers (Model) | 2                                                 |
| Encoder hidden layer size (Model)       | 512                                               |
| Decoder hidden layer size (Model)       | 512                                               |
| Model critic ( $g$ )                    | Single layer MLP (512)                            |

Table 4: Hyper-parameters used for the Invariant-SAC-SVG algorithm.

### 3.4 MBPO VS POPLIN ENVIRONMENTS

For our MBRL experiments, we used two sets of MuJoCo-based environments, each used before in individual papers. Specifically, the POPLIN based environments were originally used in the paper by [55]. These refer to the ‘-v0’ versions from OpenAI Gym [8] and also includes a separately tweaked Cheetah (called PETS-Cheetah) and Swimmer environments. On the other hand, the MBPO based environments refer to the ones used by the paper [28] and largely correspond to the ‘-v2’ versions from OpenAI Gym. These include an additional reward for staying alive throughout an episode.

### 3.5 SPURIOUS CORRELATION

For the experiment in Section ??, we used three different input strategies to test for the presence of spurious correlations in model learning. Here, we define the exact masking schemes used. We are interested in only predicting a single dimension here— the left knee joint position. Below are the masking detailed descriptions:

- **No Mask:** None of the observation dimensions are masked.
- **Mask:** Dimensions that are seemingly uncorrelated to the left knee joint are masked. Specifically, {left\_shoulder\_1, left\_shoulder\_2, left\_elbow} (qpos and qvel)
- **Mask\_2:** Dimensions that are seemingly correlated to the left knee joint are masked. Specifically, {left\_hip\_x, left\_hip\_y, left\_hip\_z, left\_knee} (qpos and qvel)

### 3.6 INVARIANT MODEL LEARNING

For our invariant model learner, we test on offline data collected in a replay buffer during the first 1M training steps of a model-free SAC agent. We start model training with the initial samples from the replay buffer and continue to add more as the training progresses. Such a scheme ensures that we have access to changing state distributions as the policy changes while remaining isolated from direct policy optimization on the MDP.

## 4 EXTENDED RELATED WORK

Our emphasis here is always on sparsity and not on factorization. Factorization is what the factored MDPs literature is largely concerned with. Guestrin et al. [25], Osband & Van Roy [42], Tian et al. [52], Xu & Tewari [56] assume known graph structure and do not segregate between the assumptions of factorization and sparsity, often highlighting factorization more. We use factorization in the initial part of the paper to show the benefits of sparsity in a concise manner (both for theorem 1 and

| MBPO        | Cheetah       | Walker        | Hopper          | Ant           |
|-------------|---------------|---------------|-----------------|---------------|
| SAC-SVG H-3 | 0.0015        | 0.0025        | 4.38e-05        | 0.0026        |
| OURS H-3    | <b>0.0026</b> | <b>0.0031</b> | <b>4.76e-05</b> | <b>0.0036</b> |
| SAC-SVG H-4 | 0.0027        | 0.0020        | 5.75e-05        | 0.0051        |
| OURS H-4    | <b>0.0041</b> | <b>0.0033</b> | <b>8.23e-05</b> | <b>0.0078</b> |
| SAC-SVG H-5 | 0.0048        | 0.0026        | 7.34e-05        | 0.0091        |
| OURS H-5    | <b>0.0094</b> | <b>0.0048</b> | <b>1.64e-04</b> | <b>0.0163</b> |

Table 5: **Training model error** at 200k steps for the Invariant and Standard learners on five MuJoCo based domains from MBPO [28] with 10 seeds. In all cases, we see that the invariant learner has a higher loss than the standard learner, potentially indicating at the over-fitting happening in the standard learner.

section 5). However, it is important to note that it is sparsity that allows us to make connections to representations computed in neural networks. Factorization merely facilitates better/concise theory. Indeed, if we assume nothing about factorization (no factor MDP setting) and only assume sparsity, we can still come up with different interesting cases where sparsity alone would guarantee factorization at some level of groupings of state components. One simple example is deterministic MDPs where factorization is trivially satisfied already. Doing so would complicate the analysis because we must consider different cases now, but would lead to a similar conclusion as is presented in the paper. On the other hand, if we do not consider sparsity and only factorization, any of these connections to abstractions and neural network generalizations cannot be made. Indeed Guestrin et al. [25], Osband & Van Roy [42], Tian et al. [52], Xu & Tewari [56] do not provide any empirical results and require knowing the parents, i.e., graph structure a priori, making extensions to neural networks impractical. Again, if the graph is fully connected, predicting any of the state components would require inputting the entire state and thus this specific kind of spurious correlations would not arise.

Perhaps a different view helps communicate this better. The abstraction viewpoint is precisely what allows us to scale our formalism to practical methods. It allows us to connect the initial formalism to the concrete problem of neural network generalization (without an abstraction-based formalism, it does not make sense to use neural networks). It allows us to identify a specific form of overfitting, why it occurs and when it occurs (when system is sparse, which is true for realistic settings and data is non-iid) and in turn what regularization technique would make sense in practice. Papers that deal with learning the graph structure and then doing RL [50, 16, 26], do it by constructing close to optimal transition functions, and then planning. In our practical method, we focus on only avoiding spurious correlations, which is computationally more practical since by the time an exact model of the MDP can be learnt, most model-free methods can learn the reward function and perform much better. Guestrin et al. [25] state a similar idea but simply assume that one is given basis functions that have limited scope (model-invariant abstractions).

On the theory side, most prior works on factored MDPs also do not learn and leverage state abstractions [31, 50]. Jonsson & Barto [30] draw connections to causal inference, but do so explicitly with dynamic Bayesian networks (DBN)—as opposed to learning approximate abstractions—and assume knowledge of the model. Most recently, Misra et al. [39] tackle the rich observation factored MDP setting, but consider each pixel an atom that belongs to a single factor.
